# Supplementary material for: A Soil Screening Study to Evaluate Soil Health for Urban Garden Applications in Hartford, CT
Source: MDPI journal article supplement (doi:10.3390/su15107924), 2023-05-12
Supplement: s1 [file s1]

## Supplementary Materials

**Table S1:** Statistical analysis on moisture content data from lots 2 and 3 determined at the 95% CI.

| Element | t-test for Means       | F-Test for Dataset Comparison <sup>1</sup> | Avg. % Difference <sup>2</sup> |
|---------|------------------------|--------------------------------------------|--------------------------------|
| Sr      | $7.535 \times 10^{-7}$ | $2.953 \times 10^{-14}$                    | 19.47                          |
| Rb      | $9.800 \times 10^{-5}$ | 0                                          | 19.78                          |
| Ca      | $9.319 \times 10^{-6}$ | 0                                          | 19.79                          |
| Fe      | $1.391 \times 10^{-3}$ | 0                                          | 22.43                          |
| Zn      | 0.08111                | $4.119 \times 10^{-9}$                     | 23.82                          |
| Mn      | $2.579 \times 10^{-4}$ | 0                                          | 24.18                          |
| Pb      | 0.1753                 | $1.128 \times 10^{-12}$                    | 24.37                          |
| Cu      | 0.1904                 | $5.173 \times 10^{-6}$                     | 26.62                          |
| Ni      | $4.755 \times 10^{-3}$ | 0                                          | 45.35                          |
| Cr      | $1.819 \times 10^{-7}$ | $3.599 \times 10^{-11}$                    | 50.72                          |

<sup>1</sup>The two datasets used for the statistical tests were wet concentration vs. dry concentration and dry concentration vs. dry concentration.

<sup>2</sup>The percent difference was calculated for dry vs. wet pXRF measurements.

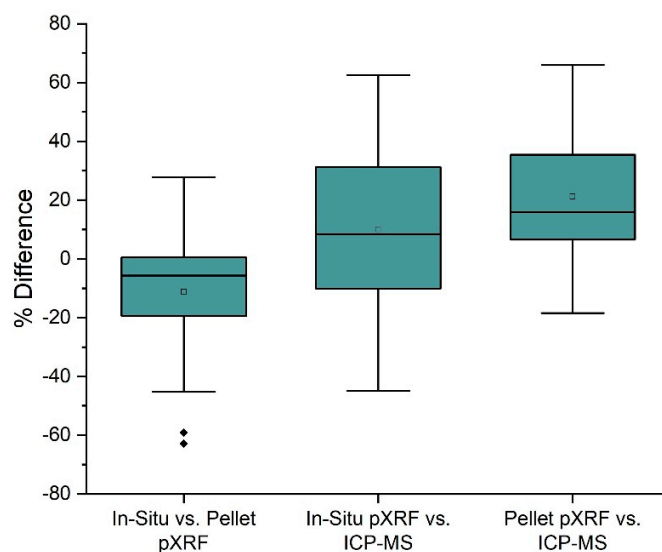

**Figure S1.** Boxplot representation of the relative differences between various analysis methods of Pb.

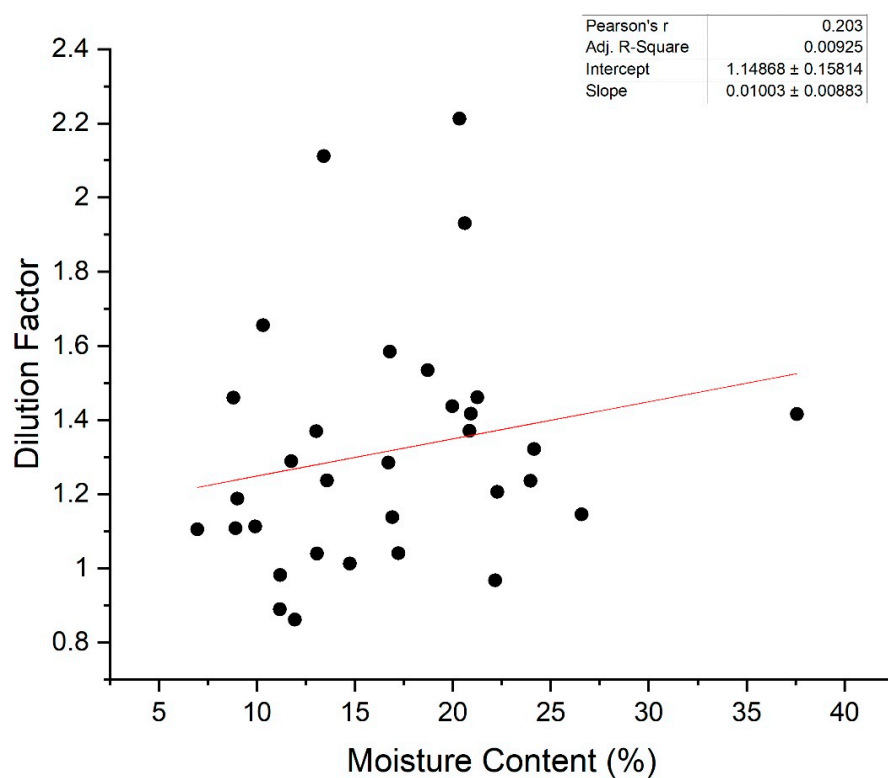

**Figure S2.** Linear regression for moisture content and dilution factor for Pb measurements, where dilution factor is simply the quotient of the dry Pb concentration and wet Pb concentration.

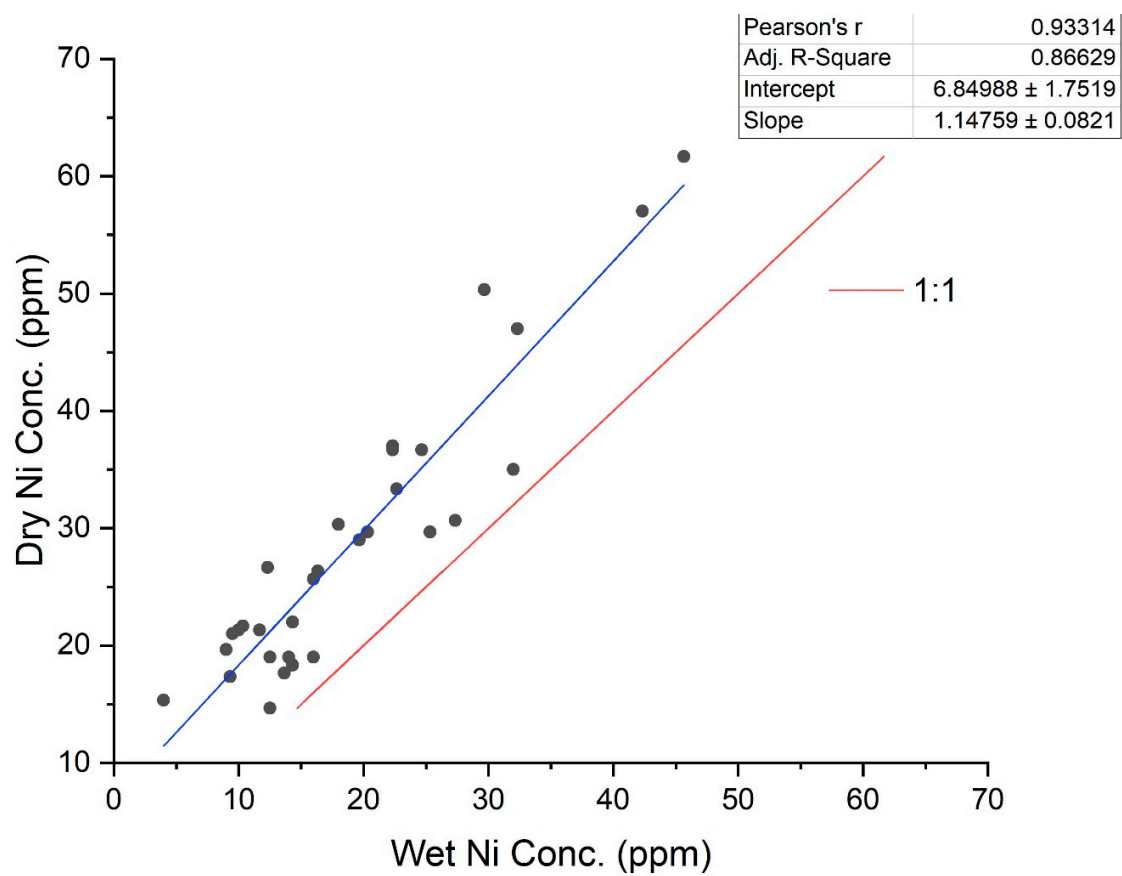

**Figure S3.** Linear correlation between wet (in-situ) and dry pXRF Ni measurements ( $n=31$ ,  $R^2=0.8663$ ) indicated by the blue line; the red line indicates a regression with a slope of 1.

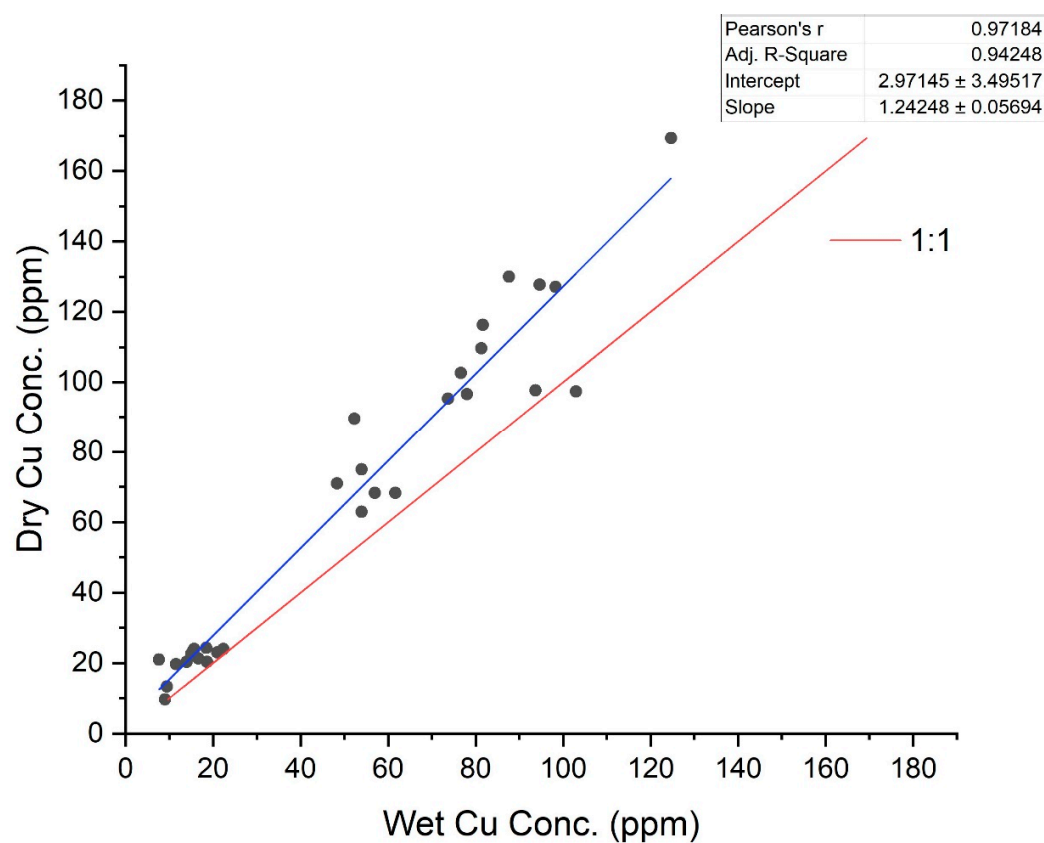

**Figure S4.** Linear correlation between wet (in-situ) and dry pXRF Cu measurements (n=30,  $R^2=0.9425$ ) indicated by the blue line; the red line indicates a regression with a slope of 1

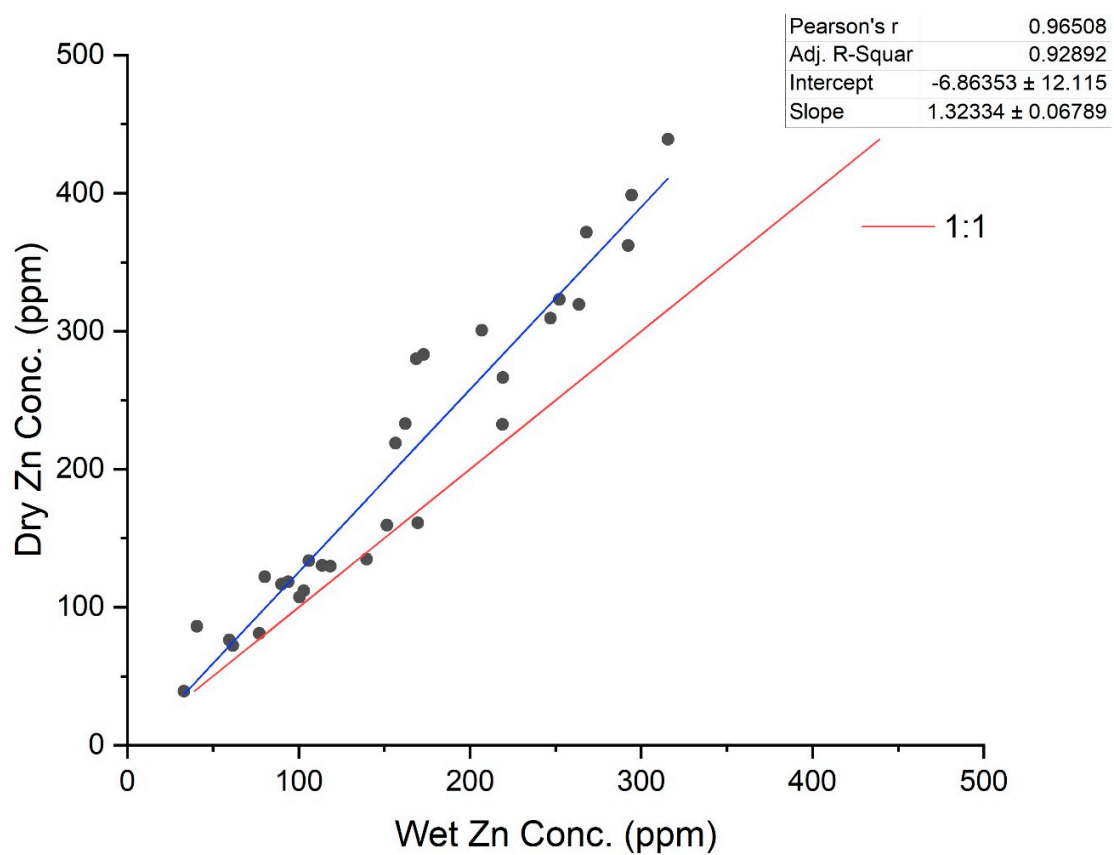

**Figure S5.** Linear correlation between wet (in-situ) and dry pXRF Zn measurements (n=30,  $R^2=0.9289$ ) indicated by the blue line; the red line indicates a regression with a slope of 1
